# Supplementary material for: Commercial Bone Grafts Claimed as an Alternative to Autografts: Current Trends for Clinical Applications in Orthopaedics
Source: MDPI journal article supplement (doi:10.3390/ma14123290), 2021-06-14
Supplement: s1 [file s1]

## Supplementary Materials

# Commercial Bone Grafts Claimed as an Alternative to Autografts: Current Trends for Clinical Applications in Orthopaedics

Marco Govoni <sup>1,\*</sup>, Leonardo Vivarelli <sup>1,\*</sup>, Alessandro Mazzotta <sup>1</sup>, Cesare Stagni <sup>1</sup>, Alessandra Maso <sup>2</sup> and Dante Dallari <sup>1</sup>

<sup>1</sup> Reconstructive Orthopaedic Surgery and Innovative Techniques-Musculoskeletal Tissue Bank, IRCCS Istituto Ortopedico Rizzoli, 40136 Bologna, Italy; alessandro.mazzotta@ior.it (A.M.); cesare.stagni@ior.it (C.S.); dante.dallari@ior.it (D.D.)

<sup>2</sup> Laboratory of Microbiology and GMP Quality Control, IRCCS Istituto Ortopedico Rizzoli, 40136 Bologna, Italy; alessandra.maso@ior.it

\* Correspondence: marco.govoni@ior.it (M.G.); leonardo.vivarelli@ior.it (L.V.)

**Table S1.** List of website links of commercially available products claimed as an alternative to autografts.

| Class of Bone Grafts   | Manufacturer                               | Commercial Name                 | Website Link                                                                                                                                                                                                                                    |
|------------------------|--------------------------------------------|---------------------------------|-------------------------------------------------------------------------------------------------------------------------------------------------------------------------------------------------------------------------------------------------|
| Cellular bone matrices | Nuvasive, San Diego, CA, USA               | Osteocel® Plus<br>Osteocel® PRO | <a href="https://www.nuvasive.com/procedures/featured-offerings/biologics/">https://www.nuvasive.com/procedures/featured-offerings/biologics/</a> (accessed date: 09 June 2021)                                                                 |
|                        | Orthofix Medical Inc., Lewisville, TX, USA | Trinity EVOLUTION®              | <a href="https://www.orthofix.com/ifus/trinity-evolution/">https://www.orthofix.com/ifus/trinity-evolution/</a> (accessed date: 09 June 2021)                                                                                                   |
|                        |                                            | Trinity ELITE®                  | <a href="https://www.orthofix.com/ifus/trinity-elite/">https://www.orthofix.com/ifus/trinity-elite/</a> (accessed date: 09 June 2021)                                                                                                           |
|                        | Vivex Biologics Inc., Miami, FL, USA       | Via® Graft<br>Via® Form         | <a href="https://vivex.com/by-brand/via/">https://vivex.com/by-brand/via/</a> (accessed date: 09 June 2021)                                                                                                                                     |
|                        | DePuy Synthes, Raynham, MA, USA            | ViviGen®<br>ViviGen® Formable   | <a href="https://www.jnjmedicaldevices.com/en-US/product/vivigen-cellular-bone-matrix">https://www.jnjmedicaldevices.com/en-US/product/vivigen-cellular-bone-matrix</a> (accessed date: 09 June 2021)                                           |
|                        | Stryker, Kalamazoo, MI, USA                | BIO4™                           | <a href="https://www.stryker.com/us/en/trauma-and-extremities/products/bio4.html">https://www.stryker.com/us/en/trauma-and-extremities/products/bio4.html</a> (accessed date: 09 June 2021)                                                     |
|                        | Zimmer Biomet, Warsaw, IN, USA             | PrimaGen®                       | <a href="https://www.zimmerbiomet.com/medical-professionals/spine/product/primagen-advanced-allograft.html">https://www.zimmerbiomet.com/medical-professionals/spine/product/primagen-advanced-allograft.html</a> (accessed date: 09 June 2021) |
|                        | RTI Surgical, Alachua, FL, USA             | Map3®                           | <a href="https://www.lifehealthcare.com.au/wp-content/uploads/2017/06/MAP3-Technical_Brochure_FINAL.pdf">https://www.lifehealthcare.com.au/wp-content/uploads/2017/06/MAP3-Technical_Brochure_FINAL.pdf</a> (accessed date: 09 June 2021)       |
|                        | Paragon 28, Englewood, CO, USA             | V92™<br>V92-FC™                 | <a href="https://www.paragon28.com/products/v92-cellular-bone-matrix/">https://www.paragon28.com/products/v92-cellular-bone-matrix/</a> (accessed date: 09 June 2021)                                                                           |

|                                                 |                                                  |                      |                                                                                                                                                                                     |
|-------------------------------------------------|--------------------------------------------------|----------------------|-------------------------------------------------------------------------------------------------------------------------------------------------------------------------------------|
|                                                 | Chamber Spine. King of Prussia, PA, USA          | SCYLLA™<br>SCYLLA™-F | <a href="https://www.cambermedtech.com/scylla-cellular-bone-matrix">https://www.cambermedtech.com/scylla-cellular-bone-matrix</a><br>(accessed date: day month year)                |
|                                                 | Royal Biologics, Hackensack, NJ, USA             | Magnus               | <a href="https://royalbiologics.com/magnus-graft/">https://royalbiologics.com/magnus-graft/</a><br>(accessed date: 09 June 2021)                                                    |
|                                                 | Omnia Medical, Morgantown, WV, USA               | CeLLogix             | <a href="https://omniamedical.com/products/cellogix">https://omniamedical.com/products/cellogix</a><br>(accessed date: 09 June 2021)                                                |
|                                                 | Medtronic Spinal and Biologics, Memphis, TN, USA | INFUSE®              | <a href="https://global.medtronic.com/xgen/e/response/infuse-bone-graft.html">https://global.medtronic.com/xgen/e/response/infuse-bone-graft.html</a> (accessed date: 09 June 2021) |
|                                                 | Lynch Biologics, Franklin, TN, USA               | Gem 21S              | <a href="https://www.lynchbiologics.com/products/gem-21s/">https://www.lynchbiologics.com/products/gem-21s/</a> (accessed date: 09 June 2021)                                       |
| <b>Growth factor enhanced bone grafts</b>       | Wright Medical Group N.V., Memphis, TN, USA      | Augment®             | <a href="https://www.augmentbonegraft.com/">https://www.augmentbonegraft.com/</a><br>(accessed date: 09 June 2021)                                                                  |
|                                                 | Bioventus LLC, Durham, NC, USA                   | OsteoAMP®            | <a href="https://www.bioventussurgical.com/product/osteoamp/">https://www.bioventussurgical.com/product/osteoamp/</a> (accessed date: 09 June 2021)                                 |
| <b>Peptide enhanced xeno-hybrid bone grafts</b> | IBI, Mezzo-Vico Vira, Switzerland                | SmartBone®           | <a href="https://www.ibi-sa.com/products/smartbone/#_">https://www.ibi-sa.com/products/smartbone/#_</a> (accessed date: 09 June 2021)                                               |
|                                                 | Cerapedics, Westminster, CO, USA                 | i-FACTOR®            | <a href="https://cerapedics.com/i-factor-and-p-15">https://cerapedics.com/i-factor-and-p-15</a><br>(accessed date: 09 June 2021)                                                    |
